# Supplementary material
Source: PubMed Central journal article supplement (PMC9614673)
Supplement: jamaophthalmol-e224394-s001.pdf [file jamaophthalmol-e224394-s001.pdf]

## Supplemental Online Content

McCann P, Abraham AG, Mukhopadhyay A, et al. Prevalence and incidence of dry eye and meibomian gland dysfunction in the United States: a systematic review and meta-analysis. *JAMA Ophthalmol*. Published online October 27, 2022. doi:10.1001/jamaophthalmol.2022.4394

**eFigure 1.** PRISMA search flow diagram

**eFigure 2.** Forest plot of dry eye prevalence including all studies

**eTable 1.** MEDLINE and Embase search strategies

**eTable 2.** Excluded full texts

**eTable 3.** Risk of bias assessments for prevalence and incidence studies

**eTable 4.** Stratified associations with dry eye and meibomian gland dysfunction

**eTable 5.** Univariable model associations with dry eye and meibomian gland dysfunction

**eTable 6.** Multivariable model associations with dry eye and meibomian gland dysfunction

This supplemental material has been provided by the authors to give readers additional information about their work.

eFigure 1 PRISMA Search Flow Diagram

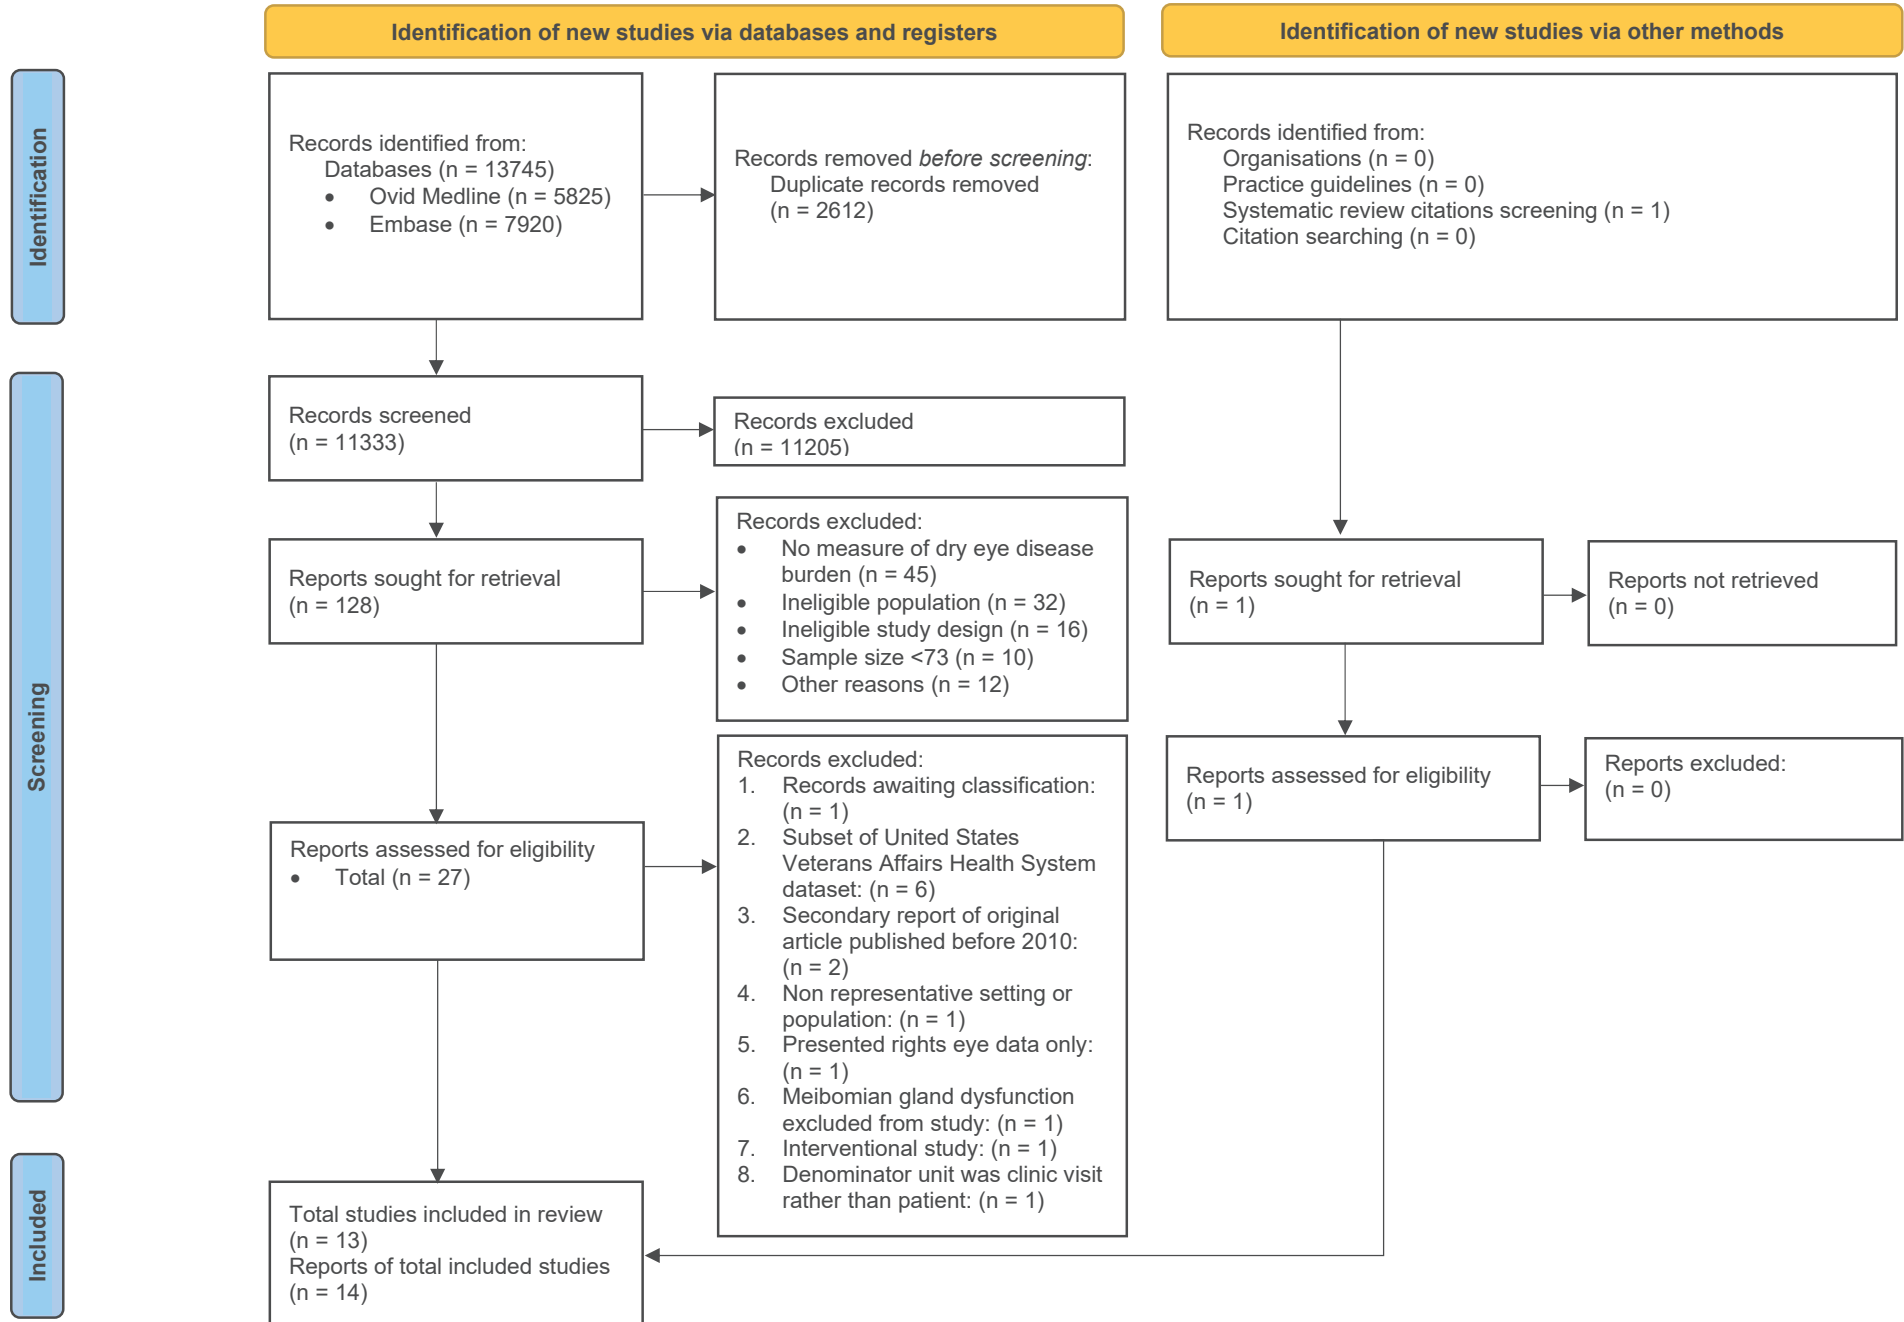

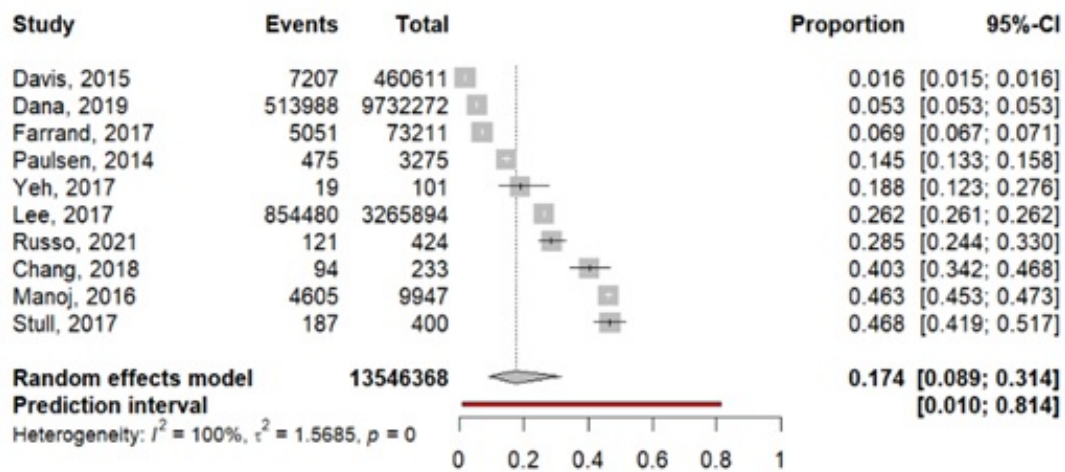

**eFigure 2** Forest Plot of dry eye prevalence including all studies

eTable 1. MEDLINE and Embase search strategies

| <b>MEDLINE (via Ovid MEDLINE® ALL)</b> |                                                                      |
|----------------------------------------|----------------------------------------------------------------------|
| 1                                      | exp Dry Eye Syndromes/                                               |
| 2                                      | exp Keratoconjunctivitis Sicca/                                      |
| 3                                      | exp Xerophthalmia/                                                   |
| 4                                      | exp Meibomian Glands/                                                |
| 5                                      | (dry* adj3 eye*).tw,kf.                                              |
| 6                                      | ((keratoconjunctivitis or kerato-conjunctivitis) adj1 sicca).tw,kf.  |
| 7                                      | xerophthalmi*.tw,kf.                                                 |
| 8                                      | meibomian gland dysfunction.tw,kf.                                   |
| 9                                      | exp Sjogren's Syndrome/                                              |
| 10                                     | ((Sjogren* or Sjoegren*) adj1 (syndrom* or disease*)).tw,kf.         |
| 11                                     | (9 or 10) and (exp Eye/ or eye*.mp. or ocular*.mp. or ophthalm*.mp.) |
| 12                                     | or/1-8,11                                                            |
| 13                                     | exp Epidemiology/                                                    |
| 14                                     | exp Epidemiologic Methods/                                           |
| 15                                     | epidemiology.fs.                                                     |
| 16                                     | burden of disease.tw,kf.                                             |
| 17                                     | DALY*.tw,kf.                                                         |
| 18                                     | death rate*.tw,kf.                                                   |
| 19                                     | Disability Adjusted Life Years.tw,kf.                                |
| 20                                     | disease burden.tw,kf.                                                |
| 21                                     | endemic*.tw,kf.                                                      |
| 22                                     | epidemic*.tw,kf.                                                     |
| 23                                     | epidemiolog*.tw,kf.                                                  |
| 24                                     | frequency.tw,kf.                                                     |
| 25                                     | incidence*.tw,kf.                                                    |
| 26                                     | morbidities.tw,kf.                                                   |
| 27                                     | morbidity.tw,kf.                                                     |
| 28                                     | occurrence.tw,kf.                                                    |
| 29                                     | outbreak*.tw,kf.                                                     |
| 30                                     | prevalence.tw,kf.                                                    |
| 31                                     | surveillance.tw,kf.                                                  |

32 survival rate\*.tw,kf.  
33 years lived with disability.tw,kf.  
34 years of life lost.tw,kf.  
35 YLD\*.tw,kf.  
36 YLL\*.tw,kf.  
37 or/13-36  
38 12 and 37  
39 38 NOT (exp animals/ NOT exp humans/)  
40 limit 39 to yr="2010 -Current"

**Embase (via Elsevier)**

#1 'dry eye'/exp  
#2 'dry eye syndrome'/exp  
#3 'evaporative dry eye disease'/exp  
#4 'keratoconjunctivitis sicca'/exp  
#5 'xerophthalmia'/exp  
#6 'meibomian gland'/exp  
#7 (dry\* NEAR/3 eye\*):ab,ti,kw  
#8 ((keratoconjunctivitis or kerato-conjunctivitis) NEAR/1 sicca):ab,ti,kw  
#9 xerophthalmi\*:ab,ti,kw  
#10 'meibomian gland dysfunction':ab,ti,kw  
#11 'Sjogren syndrome'/exp  
#12 ((Sjogren\* or Sjogren\*) NEAR/1 (syndrom\* or disease\*)):ab,ti,kw  
#13 (#11 OR #12) AND ('eye'/exp OR eye\* OR ocular\* OR ophthalm\*)  
#14 #1 OR #2 OR #3 OR #4 OR #5 OR #6 OR #7 OR #8 OR #9 OR #10 OR #13  
#15 'epidemiology'/exp  
#16 epidemiology:lnk  
#17 'burden of disease':ab,ti,kw  
#18 DALY\*:ab,ti,kw  
#19 'death rate\*':ab,ti,kw  
#20 'Disability Adjusted Life Years':ab,ti,kw  
#21 'disease burden':ab,ti,kw  
#22 endemic\*:ab,ti,kw  
#23 epidemic\*:ab,ti,kw

#24 epidemiolog\*:ab,ti,kw  
#25 frequency:ab,ti,kw  
#26 incidence\*:ab,ti,kw  
#27 morbidities:ab,ti,kw  
#28 morbidity:ab,ti,kw  
#29 occurrence:ab,ti,kw  
#30 outbreak\*:ab,ti,kw  
#31 prevalence:ab,ti,kw  
#32 surveillance:ab,ti,kw  
#33 'survival rate\*':ab,ti,kw  
#34 'years lived with disability':ab,ti,kw  
#35 'years of life lost':ab,ti,kw  
#36 YLD\*:ab,ti,kw  
#37 YLL\*:ab,ti,kw  
#38 #15 OR #16 OR #17 OR #18 OR #19 OR #20 OR #21 OR #22 OR #23 OR #24 OR #25 OR  
#26 OR #27 OR #28 OR #29 OR #30 OR #31 OR #32 OR #33 OR #34 OR #35 OR #36 OR #37  
#39 #14 AND #38  
#40 #39 NOT ([animals]/lim NOT [humans]/lim)  
#41 #40 AND [2010-2021]/py

eTable 2. Excluded full texts

| <b>Author, year</b>  | <b>Citation</b>                                                 | <b>Reason for exclusion</b>                                                                                                |
|----------------------|-----------------------------------------------------------------|----------------------------------------------------------------------------------------------------------------------------|
| Schachter, 2014      | Investigative Ophthalmology & Visual Science 2014;55: 49        | Contacted author via email: Awaiting classification                                                                        |
| Dermer, 2018         | Clinical ophthalmology (Auckland, N.Z.) 2018;12: 2471-2481      | Subset of United States Veterans Affairs Health System dataset                                                             |
| Pouyeh, 2012         | American Journal of Ophthalmology 2012;153: 1061-1066.e3        | Subset of United States Veterans Affairs Health System dataset                                                             |
| Brown, 2013          | Investigative Ophthalmology & Visual Science 2013;54: 5310      | Original dry eye prevalence published in 1997                                                                              |
| van Landingham, 2014 | British Journal of Ophthalmology 2014;98: 639 LP - 644          | Original dry eye prevalence published in 1997                                                                              |
| Sridhar, 2018        | Seminars in ophthalmology 2018;33: 185-190                      | Non representative setting or population                                                                                   |
| Murakami, 2015       | Investigative Ophthalmology & Visual Science 2015;56: 2508      | Presented data for rights eyes only                                                                                        |
| Gupta, 2018          | Cornea 2018;37: 426-430                                         | Meibomian gland dysfunction excluded from study                                                                            |
| Ziemanski, 2018      | American Journal of Ophthalmology 2018;189: 29-40               | Interventional study                                                                                                       |
| Stagg, 2014          | Investigative Ophthalmology & Visual Science 2014;55: 5572      | Denominator unit was clinic visit rather than patient                                                                      |
| Modi, 2014           | Investigative ophthalmology & visual science 2014;55: 650-653   | Subset of United States Veterans Affairs Health System dataset                                                             |
| Galor, 2013          | Investigative Ophthalmology & Visual Science 2013;54: 1426-1433 | Subset of United States Veterans Affairs Health System dataset, MGD not defined and MGD prevalence not explicitly reported |
| Galor, 2011          | American journal of ophthalmology 2011;152: 377-384.e2          | Subset of United States Veterans Affairs Health System dataset                                                             |
| Galor, 2014          | Ophthalmology 2014;121: 972-973.e1                              | Subset of United States Veterans Affairs Health System dataset                                                             |

MGD – Meibomian gland dysfunction

eTable 3. Risk of bias assessments for prevalence and incidence studies

3a. Risk of bias assessments for prevalence studies

| Risk of bias domains                                                               | Paulsen, 2014 | Davis, 2015 | Manoj, 2016 | Stull, 2017 | Yeh, 2017 | Farrand, 2017 | Lee, 2017 | Chang, 2018 | Dana, 2019 | Russo, 2021 | Alghamdi, 2016 |
|------------------------------------------------------------------------------------|---------------|-------------|-------------|-------------|-----------|---------------|-----------|-------------|------------|-------------|----------------|
| Representativeness of target population to national population                     | N             | N           | N           | N           | N         | Y             | N         | N           | Y          | N           | N              |
| Representativeness of sampling frame to target population                          | Y             | N           | N           | N           | N         | Y             | Y         | N           | Y          | N           | Y              |
| Sampling: random or census                                                         | N             | Y           | N           | N           | N         | Y             | Y         | N           | Y          | Y           | N              |
| Minimal non-response bias                                                          | Y             | Y           | N           | Y           | N         | N             | Y         | Y           | Y          | Y           | N              |
| Data collected directly from participants                                          | Y             | N           | Y           | N           | Y         | Y             | N         | Y           | N          | N           | Y              |
| Acceptable case definition                                                         | Y             | N           | Y           | N           | Y         | Y             | N         | Y           | N          | N           | Y              |
| Valid and reliable instrument                                                      | N             | N           | Y           | N           | Y         | Y             | N         | Y           | N          | N           | Y              |
| Same mode of data collection for all participants                                  | Y             | Y           | Y           | N           | Y         | Y             | Y         | Y           | Y          | Y           | Y              |
| Prevalence period appropriate                                                      | Y             | N           | N           | Y           | Y         | N             | Y         | Y           | Y          | Y           | Y              |
| Numerator(s) and denominator(s) appropriate                                        | Y             | Y           | N           | Y           | Y         | Y             | Y         | Y           | Y          | Y           | Y              |
| <b>Overall risk of bias</b>                                                        | L             | H           | H           | H           | H         | M             | M         | M           | M          | H           | H              |
| Y - yes; N - no; NA - not applicable; U - unclear; L - low; M - moderate; H - high |               |             |             |             |           |               |           |             |            |             |                |



### 3b. Risk of bias assessments for incidence studies

| Risk of bias domains                                                               | Chi, 2012* | Dana, 2019* |
|------------------------------------------------------------------------------------|------------|-------------|
| Exposed and unexposed groups recruited from the same population                    | Y          | Y           |
| Ascertainment of exposure                                                          | N          | Y           |
| Strategies to deal with confounders stated                                         | NA         | Y           |
| Participants free of the outcome at the start of the study                         | Y          | Y           |
| Valid and reliable measurement of outcome                                          | N          | Y           |
| Sufficient follow up time                                                          | Y          | Y           |
| Follow up complete or incomplete follow up described and explored                  | U          | U           |
| Appropriate statistical analysis                                                   | U          | Y           |
| Overall appraisal                                                                  | H          | M           |
| Y - yes; N - no; NA - not applicable; U - unclear; L - low; M - moderate; H - high |            |             |

eTable 4. Stratified associations with dry eye and meibomian gland dysfunction

| Study, Year of publication | Age                                                                                                                                                                        | Sex                                                      | Race / ethnicity | Medical comorbidities                                                                   | Medication use                         | US region | Year of estimate | Dry eye disease severity                               |
|----------------------------|----------------------------------------------------------------------------------------------------------------------------------------------------------------------------|----------------------------------------------------------|------------------|-----------------------------------------------------------------------------------------|----------------------------------------|-----------|------------------|--------------------------------------------------------|
| Paulsen, 2014              | 21-49 years: 14.1%<br><br>≥50 years: 15.2%<br><br>21-34 years: 12.8%<br><br>35-44 years: 14%<br><br>45-54 years: 13.9%<br><br>55-64 years: 15.5%<br><br>65-84 years: 18.9% | Males: 10.5%<br>Females: 17.9%                           |                  |                                                                                         |                                        |           |                  |                                                        |
| Manoj, 2016                |                                                                                                                                                                            | Males: 44.2% <sup>1</sup><br>Females: 47.4% <sup>1</sup> |                  | Post cataract surgery: 21.1% <sup>2</sup><br>Post refractive surgery: 9.0% <sup>2</sup> | Glaucoma medication: 6.0% <sup>2</sup> |           |                  | Tear hyperosmolarity <sup>1</sup> : 46.3% <sup>2</sup> |

|                 |  |                                                         |                                                                                                                            |                                                                                                                                                                                                                                                                                                                                                                    |                                                                                                                                                                             |  |  |                                           |
|-----------------|--|---------------------------------------------------------|----------------------------------------------------------------------------------------------------------------------------|--------------------------------------------------------------------------------------------------------------------------------------------------------------------------------------------------------------------------------------------------------------------------------------------------------------------------------------------------------------------|-----------------------------------------------------------------------------------------------------------------------------------------------------------------------------|--|--|-------------------------------------------|
|                 |  |                                                         |                                                                                                                            |                                                                                                                                                                                                                                                                                                                                                                    |                                                                                                                                                                             |  |  | Osmolarity ≥ 316 mOsm/L: 29% <sup>2</sup> |
| Alghamadi, 2016 |  | Males: 92.3% <sup>3</sup><br>Females: 7.7% <sup>3</sup> | White: 55.0% <sup>3</sup><br>Black: 41.1% <sup>3</sup><br>Hispanic: 28.7% <sup>3</sup><br>Non-Hispanic: 71.3% <sup>3</sup> | Current smoking: 35.7% <sup>3</sup><br>Hypertension: 72.1% <sup>3</sup><br>Hypercholesterolemia: 65.1% <sup>3</sup><br>Diabetes: 29.5% <sup>3</sup><br>Posttraumatic stress disorder: 24.8% <sup>3</sup><br>Depression: 53.5% <sup>3</sup><br>Arthritis: 47.3% <sup>3</sup><br>Sleep apnea: 20.9% <sup>3</sup><br>Benign prostatic hyperplasia: 19.4% <sup>3</sup> | Antidepressants: 40.3% <sup>3</sup><br>Antianxiolytics: 38.0% <sup>3</sup><br>Antihistamine: 14.7% <sup>3</sup><br>Nonsteroidal antiinflammatory agents: 34.1% <sup>3</sup> |  |  |                                           |

|                     |                                                                     |                                                        |                                                                                                                              |  |  |                                                                                                                                                   |                                                              |
|---------------------|---------------------------------------------------------------------|--------------------------------------------------------|------------------------------------------------------------------------------------------------------------------------------|--|--|---------------------------------------------------------------------------------------------------------------------------------------------------|--------------------------------------------------------------|
| Farrand, 2017       | 18-49 years: 3.4% <sup>4</sup><br><br>≥50 years: 11.3% <sup>4</sup> | Males: 4.5% <sup>1</sup><br>Females: 8.8% <sup>1</sup> |                                                                                                                              |  |  | Northeast: 6.69%<br>95%CI 6.14, 7.24<br>Midwest: 6.40%<br>95%CI 5.98, 6.82<br>South: 7.04%<br>95%CI 6.66, 7.41<br>West: 6.78%<br>95%CI 6.30, 7.25 | Mild: 50%<br>Moderate: 42%<br>Severe: 8%                     |
| Yeh, 2017           |                                                                     |                                                        |                                                                                                                              |  |  |                                                                                                                                                   | SPEED ≥9: 18.8% <sup>2</sup><br>SPEED ≥6: 42.6% <sup>2</sup> |
| Yalamanchi li, 2018 | 50-59 years: 7.72%<br><br>80-89 years: 13.71%                       |                                                        | Asian: 10.20%<br>95%CI 7.58, 13.59<br>Caucasian: 13.20%<br>95%CI 12.60, 13.83<br>African American: 5.56%<br>95%CI 4.87, 6.34 |  |  |                                                                                                                                                   |                                                              |

|             |                                                                                                                                                                                                                                                                                                                                                                                                                                                                                              |                                                                                                                                                                                                                                                                                                                                                                                                                                                                                                                                          |  |  |  |  |                                                                                                                                                                                                                      |                                                             |
|-------------|----------------------------------------------------------------------------------------------------------------------------------------------------------------------------------------------------------------------------------------------------------------------------------------------------------------------------------------------------------------------------------------------------------------------------------------------------------------------------------------------|------------------------------------------------------------------------------------------------------------------------------------------------------------------------------------------------------------------------------------------------------------------------------------------------------------------------------------------------------------------------------------------------------------------------------------------------------------------------------------------------------------------------------------------|--|--|--|--|----------------------------------------------------------------------------------------------------------------------------------------------------------------------------------------------------------------------|-------------------------------------------------------------|
| Chang, 2018 |                                                                                                                                                                                                                                                                                                                                                                                                                                                                                              |                                                                                                                                                                                                                                                                                                                                                                                                                                                                                                                                          |  |  |  |  |                                                                                                                                                                                                                      | DEQ5 ≥6: 40.3% <sup>2</sup><br>DEQ5 ≥12: 10.3% <sup>2</sup> |
| Dana, 2019  | 2008:<br>0.15 <sup>5,6</sup><br>2009:<br>0.17 <sup>5,6</sup><br>2010:<br>0.18 <sup>5,6</sup><br>2011:<br>0.20 <sup>5,6</sup><br>2012:<br>0.26 <sup>5,6</sup><br>2008:<br>0.42 <sup>5,7</sup><br>2009:<br>0.46 <sup>5,7</sup><br>2010:<br>0.51 <sup>5,7</sup><br>2011:<br>0.56 <sup>5,7</sup><br>2012:<br>0.65 <sup>5,7</sup><br>2008:<br>1.03 <sup>5,8</sup><br>2009:<br>1.15 <sup>5,8</sup><br>2010:<br>1.28 <sup>5,8</sup><br>2011:<br>1.40 <sup>5,8</sup><br>2012:<br>1.62 <sup>5,8</sup> | Males:<br>2.96% <sup>2,5</sup><br>Females:<br>7.78% <sup>2,5</sup><br>2005:<br>0.33 <sup>5,9</sup><br>2006:<br>0.42 <sup>5,9</sup><br>2007:<br>0.51 <sup>5,9</sup><br>2008:<br>0.62 <sup>5,9</sup><br>2009:<br>0.75 <sup>5,9</sup><br>2010:<br>0.94 <sup>5,9</sup><br>2011:<br>1.14 <sup>5,9</sup><br>2012:<br>1.55 <sup>5,9</sup><br>2005:<br>1.36 <sup>5,10</sup><br>2006:<br>1.66 <sup>5,10</sup><br>2007:<br>1.97 <sup>5,10</sup><br>2008:<br>2.30 <sup>5,10</sup><br>2009:<br>2.67 <sup>5,10</sup><br>2010:<br>3.16 <sup>5,10</sup> |  |  |  |  | 2005: 0.83 <sup>5</sup><br>2006: 1.03 <sup>5</sup><br>2007: 1.23 <sup>5</sup><br>2008: 1.44 <sup>5</sup><br>2009: 1.69 <sup>5</sup><br>2010: 2.03 <sup>5</sup><br>2011: 2.38 <sup>5</sup><br>2012: 3.02 <sup>5</sup> |                                                             |

|                                                                                                                                                                                                                                                                                                            |  |                                                                |  |  |  |  |  |  |
|------------------------------------------------------------------------------------------------------------------------------------------------------------------------------------------------------------------------------------------------------------------------------------------------------------|--|----------------------------------------------------------------|--|--|--|--|--|--|
|                                                                                                                                                                                                                                                                                                            |  | 2011:<br>3.65 <sup>5,10</sup><br>2012:<br>4.52 <sup>5,10</sup> |  |  |  |  |  |  |
| 1 - Proportion of sex group<br>2 - Proportion of all participants<br>3 - Proportion of participants with meibum quality score $\geq 2$<br>4 - Self-reported diagnosis AND symptoms<br>5 - Overall DED prevalence<br>6 - 18-39 years<br>7 - 40-49 years<br>8 - $\geq 50$ years<br>9 - Males<br>10 - Females |  |                                                                |  |  |  |  |  |  |

eTable 5. Univariable model associations with dry eye and meibomian gland dysfunction

| Study, Year of publication | Age | Sex                                             | Race / ethnicity                                                                                                                                                                                                                                  | Medical comorbidities                                                                                                                                                                                                                                                                                                                                       | Medication use                                                                                                                                                  |
|----------------------------|-----|-------------------------------------------------|---------------------------------------------------------------------------------------------------------------------------------------------------------------------------------------------------------------------------------------------------|-------------------------------------------------------------------------------------------------------------------------------------------------------------------------------------------------------------------------------------------------------------------------------------------------------------------------------------------------------------|-----------------------------------------------------------------------------------------------------------------------------------------------------------------|
| Davis, 2015                |     |                                                 |                                                                                                                                                                                                                                                   | Diabetes mellitus: OR 2.25                                                                                                                                                                                                                                                                                                                                  |                                                                                                                                                                 |
| Lee, 2017                  |     | Female: OR 1.25 95%CI 1.24, 1.27 <sup>1,2</sup> | Black: OR 1.05 95%CI 1.04, 1.05 <sup>1,3</sup>                                                                                                                                                                                                    | Migraine: OR 1.31 95%CI 1.30, 1.32 <sup>2</sup><br>Rheumatoid arthritis: OR 1.93 95%CI 1.90, 1.96 <sup>2</sup><br>Diabetic neuropathy: OR 1.72 95%CI 1.71, 1.73 <sup>2</sup><br>Anxiety: OR 1.31 95%CI 1.30, 1.32 <sup>2</sup><br>Depression: OR 1.36 95%CI 1.35, 1.37 <sup>2</sup><br>Posttraumatic stress disorder: OR 1.27 95%CI 1.26, 1.28 <sup>2</sup> | Analgesics: OR 2.07 95%CI 2.05, 2.08 <sup>2</sup><br>Antidepressant: OR 1.53 95%CI 1.52, 1.54 <sup>2</sup><br>Anxiolytic: OR 1.44 95%CI 1.43, 1.45 <sup>2</sup> |
| Farrand, 2017              |     |                                                 | White: 7.03% 95%CI 6.79, 7.27 <sup>4</sup><br>African American: 6.29% 95%CI 5.49, 7.09 <sup>4</sup><br>Hispanic: 6.23% 95%CI 5.50, 6.96 <sup>4</sup><br>Asian: 4.25% 95%CI 3.57, 4.93 <sup>4</sup><br>Other: 8.74% 95%CI 7.33, 10.16 <sup>4</sup> |                                                                                                                                                                                                                                                                                                                                                             |                                                                                                                                                                 |

|                                                                                                                                                                                                                                                                                                              |                        |                                                                                                    |                                                                                                      |                                                                                                                                                                                                                                                                                                                                                                                                                                                                      |                                                                                                                                                                                                                                                                                                                                                                                                                                                                                                                      |
|--------------------------------------------------------------------------------------------------------------------------------------------------------------------------------------------------------------------------------------------------------------------------------------------------------------|------------------------|----------------------------------------------------------------------------------------------------|------------------------------------------------------------------------------------------------------|----------------------------------------------------------------------------------------------------------------------------------------------------------------------------------------------------------------------------------------------------------------------------------------------------------------------------------------------------------------------------------------------------------------------------------------------------------------------|----------------------------------------------------------------------------------------------------------------------------------------------------------------------------------------------------------------------------------------------------------------------------------------------------------------------------------------------------------------------------------------------------------------------------------------------------------------------------------------------------------------------|
| Yeh, 2017                                                                                                                                                                                                                                                                                                    | p = 0.246 <sup>5</sup> | p = 0.384 <sup>5</sup>                                                                             | Asian: OR 1.47, p = 0.59 <sup>6,7</sup>                                                              |                                                                                                                                                                                                                                                                                                                                                                                                                                                                      | Allergy medication: OR 6.03 <sup>6</sup> p = 0.16                                                                                                                                                                                                                                                                                                                                                                                                                                                                    |
| Chang, 2018                                                                                                                                                                                                                                                                                                  | Insufficient data      | Female: OR 1.42 95%CI 0.80, 2.52 <sup>8</sup><br><br>Female: OR 1.91 95%CI 0.69, 5.43 <sup>9</sup> | Black: OR 0.83 95%CI 0.42, 1.65 <sup>3,8</sup><br><br>Black: OR 0.57 95%CI 0.16, 2.00 <sup>3,9</sup> | Diabetes: OR 1.31 95%CI 1.30, 1.32 <sup>8</sup><br>Hypertension: OR 1.93 95%CI 1.90, 1.96 <sup>8</sup><br>Thyroid disease: OR 1.72 95%CI 1.71, 1.73 <sup>8</sup><br>Refractive surgery: OR 1.27 95%CI 1.26, 1.28 <sup>8</sup><br><br>Diabetes: OR 3.98 95%CI 1.14, 13.86 <sup>9</sup><br>Hypertension: OR 1.27 95%CI 0.44, 3.61 <sup>9</sup><br>Thyroid disease: OR 1.99 95%CI 0.53, 7.49 <sup>9</sup><br>Refractive surgery: OR 2.28 95%CI 0.46, 11.44 <sup>9</sup> | Anxiolytic: OR 1.73 95%CI 0.64, 4.67 <sup>8</sup><br>Antidepressant: OR 1.75 95%CI 0.61, 5.01 <sup>8</sup><br>Antihistamine: OR 1.83 95%CI 0.85, 3.96 <sup>8</sup><br>Analgesics: OR 1.70 95%CI 0.78, 3.70 <sup>8</sup><br>Glaucoma medication: OR 0.49 95%CI 0.05, 4.76 <sup>8</sup><br><br>Anxiolytic: OR 1.17 95%CI 0.25, 5.48 <sup>9</sup><br>Antidepressant: OR 1.37 95%CI 0.29, 6.47 <sup>9</sup><br>Antihistamine: OR 3.33 95%CI 1.25, 8.88 <sup>9</sup><br>Analgesics: OR 1.01 95%CI 0.28, 3.61 <sup>9</sup> |
| <p>1 - Reference: male<br/> 2 - No dry eye vs tear film dysfunction<br/> 3 - Reference: white<br/> 4 - Proportion of race with dry eye<br/> 5 - Meiboscore = 3<br/> 6 - No MG atrophy vs meiboscore = 3<br/> 7 - Reference: Non-Asian<br/> 8 - No symptoms vs DEQ-5 ≥6<br/> 9 - No symptoms vs DEQ-5 ≥12</p> |                        |                                                                                                    |                                                                                                      |                                                                                                                                                                                                                                                                                                                                                                                                                                                                      |                                                                                                                                                                                                                                                                                                                                                                                                                                                                                                                      |



eTable 6. Multivariable model associations with dry eye and meibomian gland dysfunction

| Study, Year of publication                                                                                                                                                                                                                                              | Age                                                                                                                                                                                                                                                                      | Sex                                           | Race / ethnicity                                                                                                                                                                                           | US region                                                                                                                                     |
|-------------------------------------------------------------------------------------------------------------------------------------------------------------------------------------------------------------------------------------------------------------------------|--------------------------------------------------------------------------------------------------------------------------------------------------------------------------------------------------------------------------------------------------------------------------|-----------------------------------------------|------------------------------------------------------------------------------------------------------------------------------------------------------------------------------------------------------------|-----------------------------------------------------------------------------------------------------------------------------------------------|
| Paulsen, 2014                                                                                                                                                                                                                                                           | OR 1.01 95%CI 1.00, 1.02 <sup>1</sup>                                                                                                                                                                                                                                    | Female: OR 1.45 95%CI 1.14, 1.85 <sup>2</sup> |                                                                                                                                                                                                            |                                                                                                                                               |
| Farrand, 2017                                                                                                                                                                                                                                                           | 35-44 years: OR 1.29 95%CI 1.14, 1.47 <sup>3</sup><br>45-54 years: OR 1.95 95%CI 1.74, 2.20 <sup>3</sup><br>55-64 years: OR 3.34 95%CI 2.98, 3.74 <sup>3</sup><br>65-74 years: OR 3.74 95%CI 3.30, 4.23 <sup>3</sup><br>≥75 years: OR 4.95 95%CI 4.26, 5.74 <sup>3</sup> | Female: OR 2.00 95%CI 1.88, 2.13 <sup>2</sup> | African American: OR 0.96 95%CI 0.86, 1.06 <sup>4</sup><br>Hispanic: OR 1.34 95%CI 1.19, 1.51 <sup>4</sup><br>Asian: OR 1.08 95%CI 0.91, 1.27 <sup>4</sup><br>Other: OR 1.44 95%CI 1.22, 1.69 <sup>4</sup> | Midwest: OR 1.02 95%CI 0.93, 1.12 <sup>5</sup><br>South: OR 1.14 95%CI 1.05, 1.24 <sup>5</sup><br>West: OR 1.08 95%CI 0.98, 1.18 <sup>5</sup> |
| <p>1 - Per increase in age group (21-34, 35-44, 45-54, 55-64, 65-84)<br/>                 2 - Reference: male<br/>                 3 - Self-reported diagnosis AND symptoms<br/>                 4 - Reference: white<br/>                 5 - Reference: Northeast</p> |                                                                                                                                                                                                                                                                          |                                               |                                                                                                                                                                                                            |                                                                                                                                               |
